# Supplementary material for: A dual-responsive fluorescent sensor for Hg2+ and thiols based on N-doped silicon quantum dots and its application in cell imaging
Source: Royal Society of Chemistry journal article supplement (doi:10.1039/c9tb01502g), 2019-01-01
Supplement: c9tb01502g1.pdf [file c9tb01502g1.pdf]

## ***Supporting Information***

### Dual-responsive fluorescence sensor for Hg<sup>2+</sup> and thiols based on N-doped silicon quantum dots and its application in cell imaging

Sansan Shen, Bohui Huang, Xiaofeng Guo, Hong Wang

Key Laboratory of Analytical Chemistry for Biology and Medicine (Ministry of  
Education), College of Chemistry and Molecular Sciences, Wuhan University, Wuhan  
430072, China

**Corresponding author:** Hong Wang

E-mail address: [hongwang@whu.edu.cn](mailto:hongwang@whu.edu.cn)

Tel.: +86-27-87218924; fax: +86-27-68754067

## Experimental

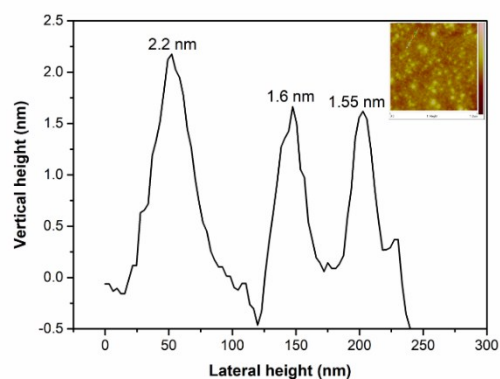

**Fig. S1** AFM height profile diagram of N-SiQD (inset: AFM image).

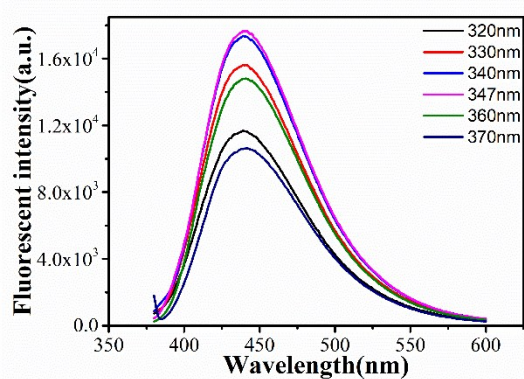

**Fig. S2** N-SiQDs fluorescence emission spectrum under different excitation emissions in the range of 320 nm to 370 nm.

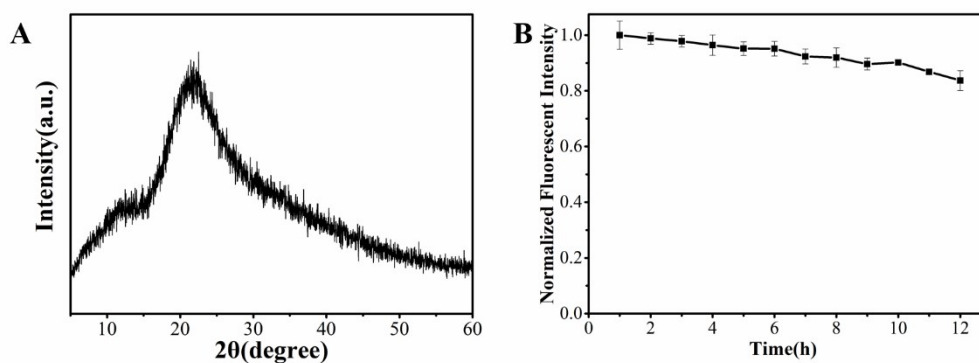

**Fig. S3** (A) XRD image of N-SiQDs. (B) Photostability of N-SiQDs ( $\lambda_{\text{ex}}/\lambda_{\text{em}}=347/440$  nm).

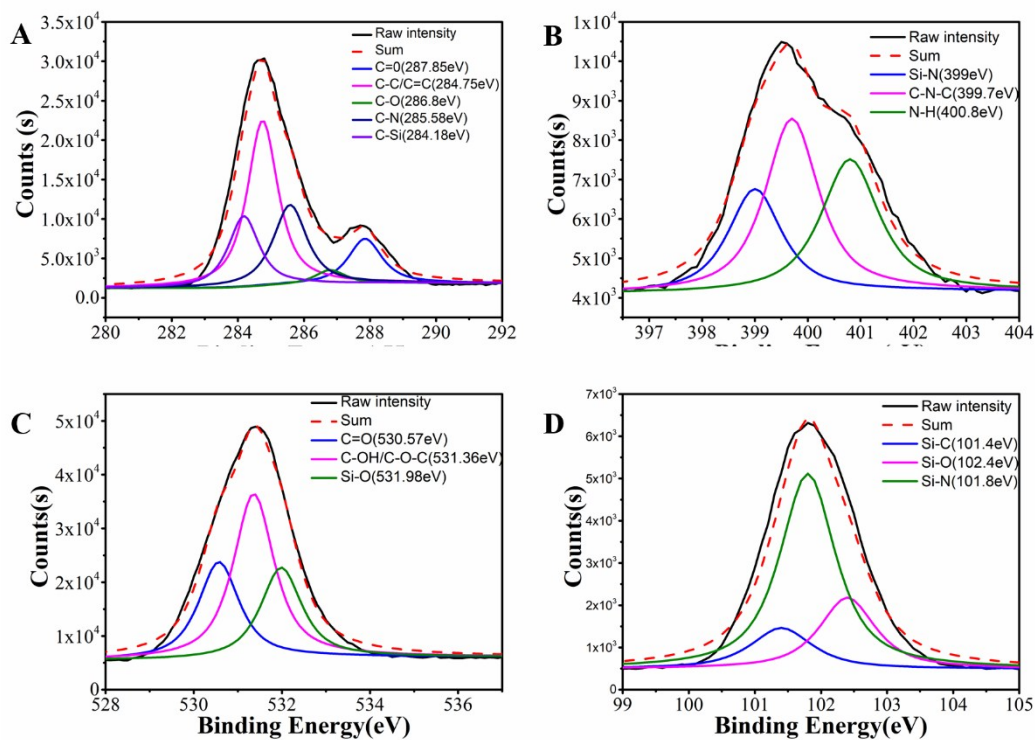

**Fig. S4** (A) C 1s spectrum, (B) N 1s spectrum, (C) O 1s spectrum and (D) Si 2p spectrum of N-SiQDs.

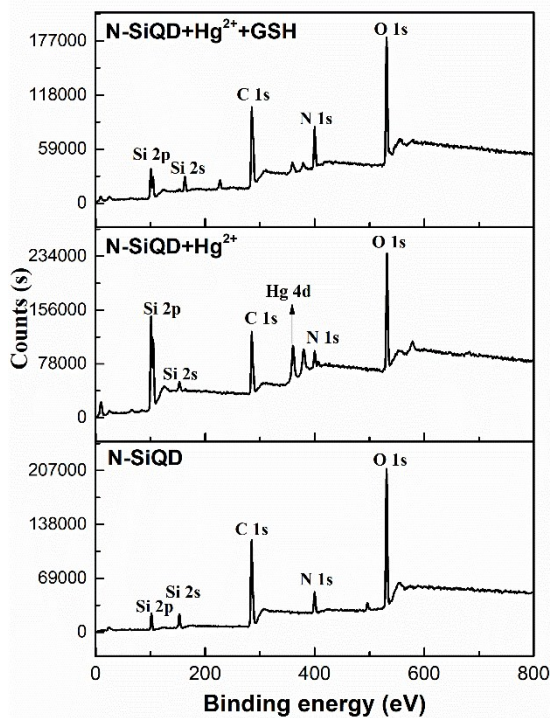

**Fig. S5** Full scan XPS spectrum of N-SiQDs, N-SiQDs+Hg<sup>2+</sup> and N-SiQDs+Hg<sup>2+</sup>+GSH.

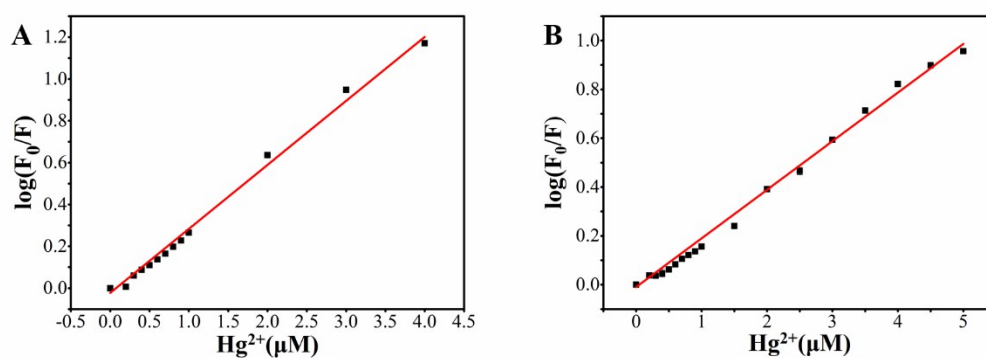

**Fig. S6** (A) A line plot of Hg<sup>2+</sup> detection when the concentration ratio between APTMS and urea is 1:1. (B) A line graph for detecting Hg<sup>2+</sup> at a concentration ratio of 1:4.

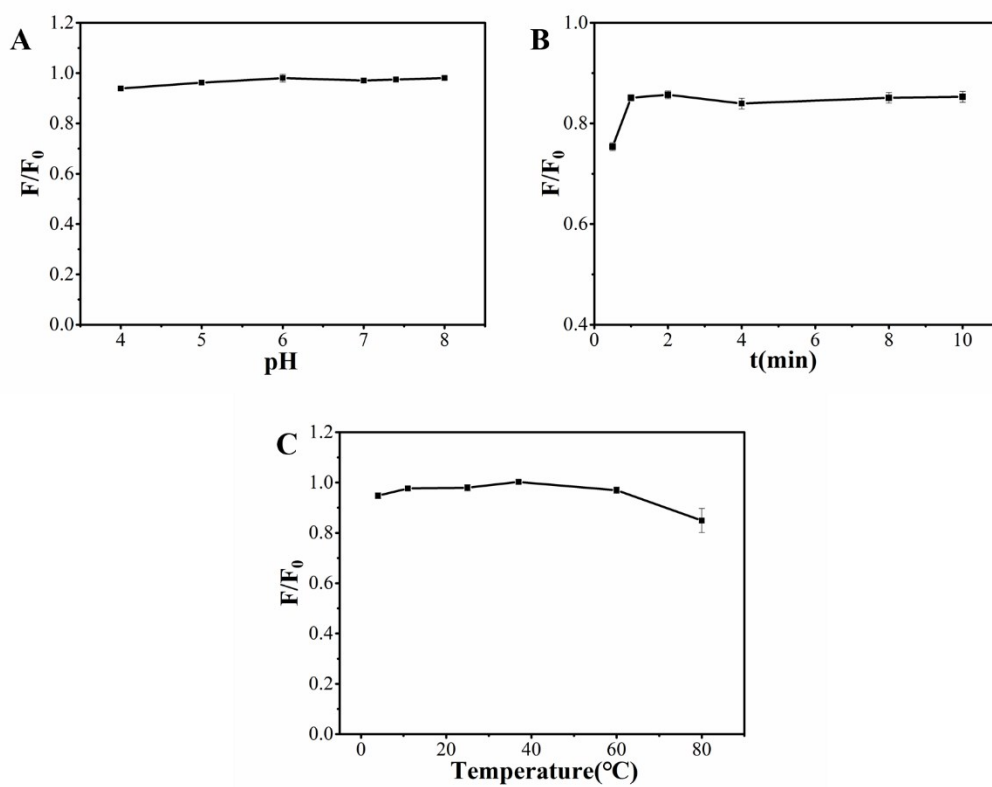

**Fig. S7** Influence of (A) pH, (B) reaction time, and (C) temperature on the fluorescent intensity of Hg<sup>2+</sup>-N-SiQDs solution ( $C_{\text{Hg}^{2+}}=5 \mu\text{M}$ ).  $F$  and  $F_0$  represented the fluorescence intensity of Hg<sup>2+</sup>-N-SiQDs with and without GSH, respectively.

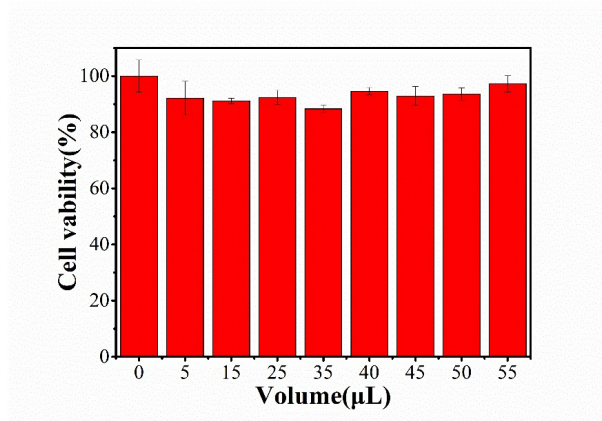

**Fig. S8** Incubation of MCF-7 cells with different volumes of N-SiQDs stock solution for 24 h.

**Table S1** Comparison of fluorescence quantum yield and linear range of N-SiQDs synthesized by different concentrations of APTMS and urea.

| $C_{\text{APTMS}}/C_{\text{urea}}$ | QY (%) | Linear range ( $\mu\text{M}$ ) |
|------------------------------------|--------|--------------------------------|
| 1:1                                | 30.6   | 0.2-4                          |
| 1:2                                | 28.8   | 0.1-5                          |
| 1:4                                | 23.9   | 0.2-5                          |

**Table S2** Comparison of response time of N-SiQDs for detecting  $\text{Hg}^{2+}$  with reported methods.

| Fluorescent sensor | Response time | Reference |
|--------------------|---------------|-----------|
| NGQDs              | 25 min        | 1         |
| CDs                | 6 min         | 2         |
| OI-FMs-120         | 2 min         | 3         |
| CdTe quantum dots  | 5 min         | 4         |
| N-CQDs             | 5 min         | 5         |
| CDs                | 5 min         | 6         |
| N-SiQDs            | 30 s          | This work |

**Table S3** Comparison of response time of N-SiQDs for detecting GSH with reported methods.

| Fluorescent sensor                 | Response time | Reference |
|------------------------------------|---------------|-----------|
| UiO-67-sbdc                        | 2 min         | 7         |
| AMC                                | 3 h           | 8         |
| AuNCs                              | 23 min        | 9         |
| DP-S                               | 120 s         | 10        |
| CQDs                               | 2 min         | 11        |
| MnO <sub>2</sub> -SiO <sub>2</sub> | 5 min         | 12        |
| N-SiQDs                            | 1 min         | This work |

### References

1. Y. Liu, X. Tang, M. Deng, Y. Cao, Y. Li, H. Zheng, F. Li, F. Yan, T. Lan, L. Shi, L. Gao, L. Huang, T. Zhu, H. Lin, Y. Bai, D. Qu, X. Huang and F. Qiu, *Microchimica Acta* **186** (3) (2019).
2. R. Tabaraki and N. Sadeghinejad, *Ecotoxicology and Environmental Safety* **153**, 101-106 (2018).
3. H. Zhang, C. Nie, J. H. Wang, R. F. Guan and D. X. Cao, *Talanta* **195**, 713-719 (2019).
4. J. Wang, F. Song, Y. Ai, S. Hu, Z. Huang and W. Zhong, *Luminescence* **34** (2), 205-211 (2019).
5. Z. Cheng, F. Du, L. Sun, L. Jiang, G. Ruan and J. Lila, *Chemistryselect* **4** (7), 2122-2128 (2019).
6. N. K. Sahoo, S. Das, G. C. Jana, M. N. Aktara, A. Patra, A. Maji, M. Beg, P. K. Jha and M. Hossain, *Microchemical Journal* **144**, 479-488 (2019).
7. J. Y. Zhu, T. F. Xia, Y. J. Cui, Y. Yang and G. D. Qian, *Journal of Solid State Chemistry* **270**, 317-323 (2019).
8. L. L. Hu, X. Wei, J. Meng, X. Y. Wang, X. W. Chen and J. H. Wang, *Sensor Actuat*

B-Chem **268**, 264-269 (2018).

9. J. R. Bhamore, S. Jha, R. K. Singhal, Z. V. P. Murthy and S. K. Kailasa, Sensor Actuat B-Chem **281**, 812-820 (2019).

10. K. X. Xu, L. W. He, Y. Z. Yang and W. Y. Lin, New Journal of Chemistry **43** (7), 2865-2869 (2019).

11. J. S. Yang, H. X. Wu, P. Yang, C. J. Hou and D. Q. Huo, Sensor Actuat B-Chem **255**, 3179-3186 (2018).

12. X. B. Zhang, R. M. Kong, Q. Q. Tan and F. L. Qu, Talanta **169**, 1-7 (2017).
